# Supplementary material for: Metallothionein–Kidney Bean Polyphenol Complexes Showed Antidiabetic Activity in Type 2 Diabetic Rats by Improving Insulin Resistance and Regulating Gut Microbiota
Source: MDPI journal article supplement (doi:10.3390/foods12163139), 2023-08-21
Supplement: s1 [file s1]

**Supplementary figure S1.** Effects of MT–kidney bean polyphenol complex on the composition of gut microbiota in rats with T2DM. (A) Indicator bacteria of gut microbiota with LDA scores in rats ( $LDA > 2$ ,  $p < 0.05$ ); (B) LEfSe cladogram.

A

## LEfSe Bar

CON  
MOD  
MIT  
MT  
MT+KBP

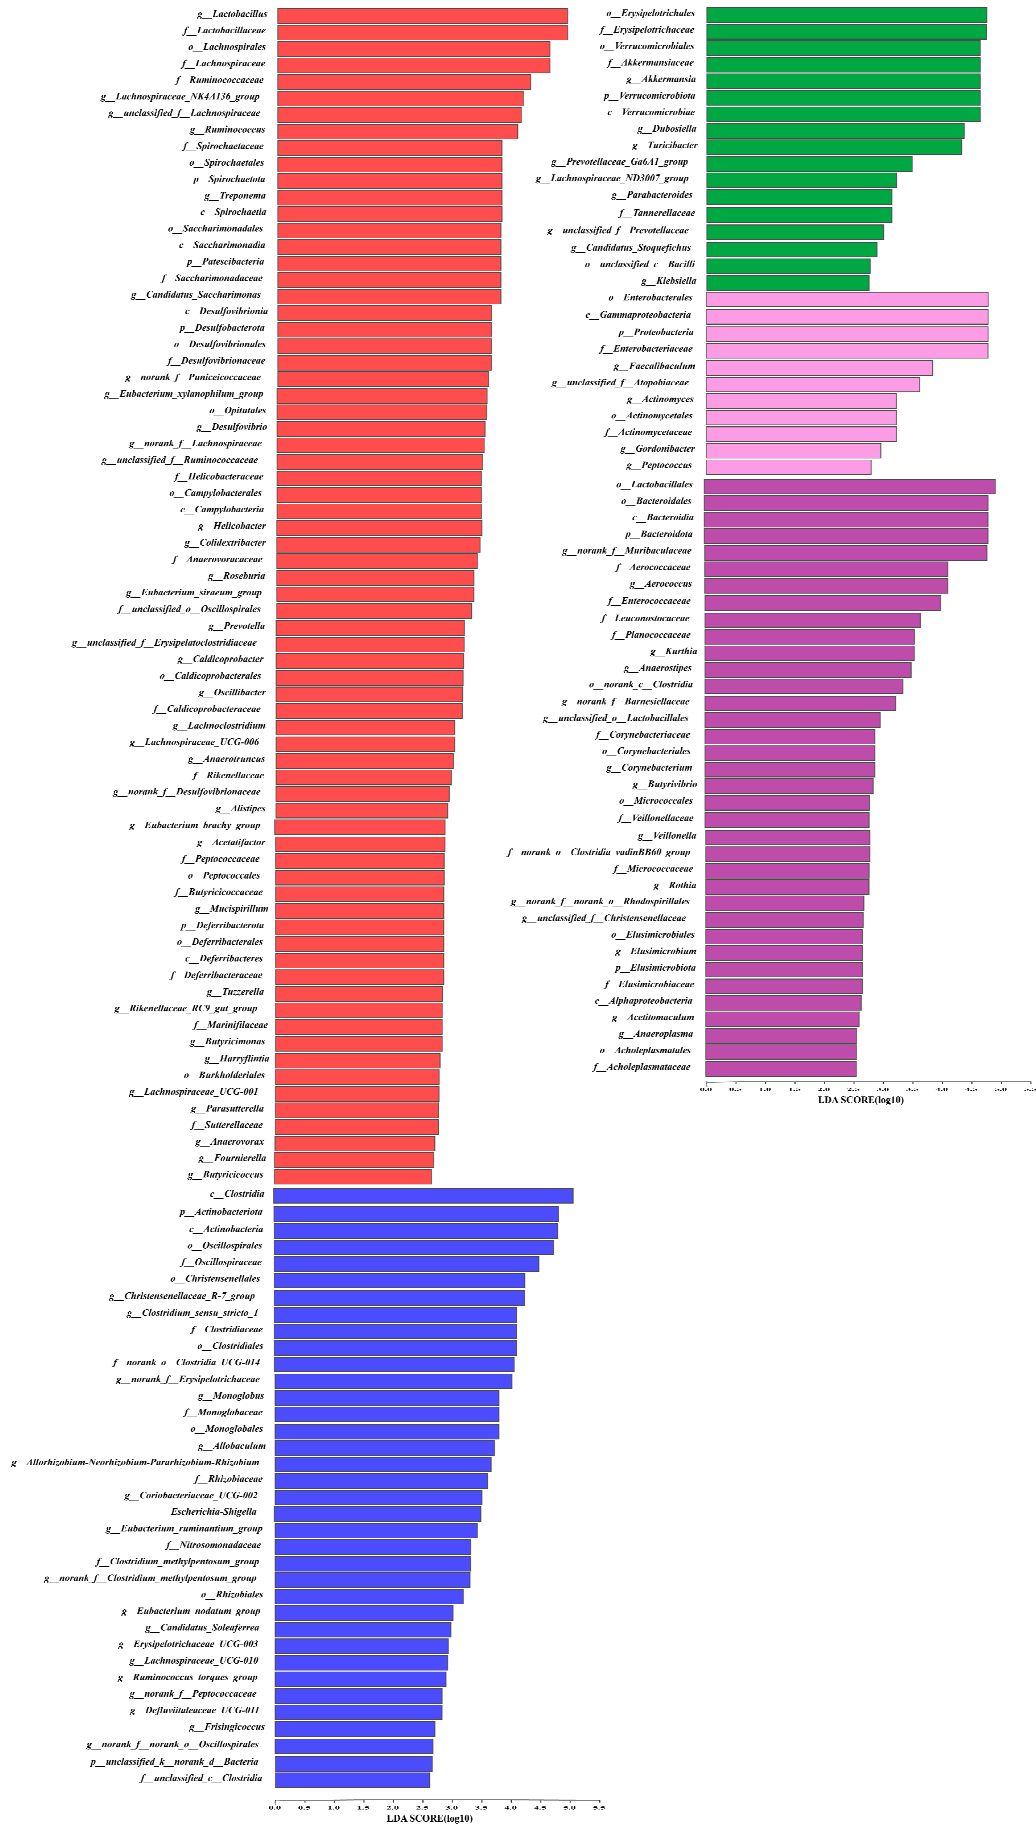

**B**

■ CON  
■ MOD  
■ MET  
■ MT  
■ MT+KBP

**Cladogram**

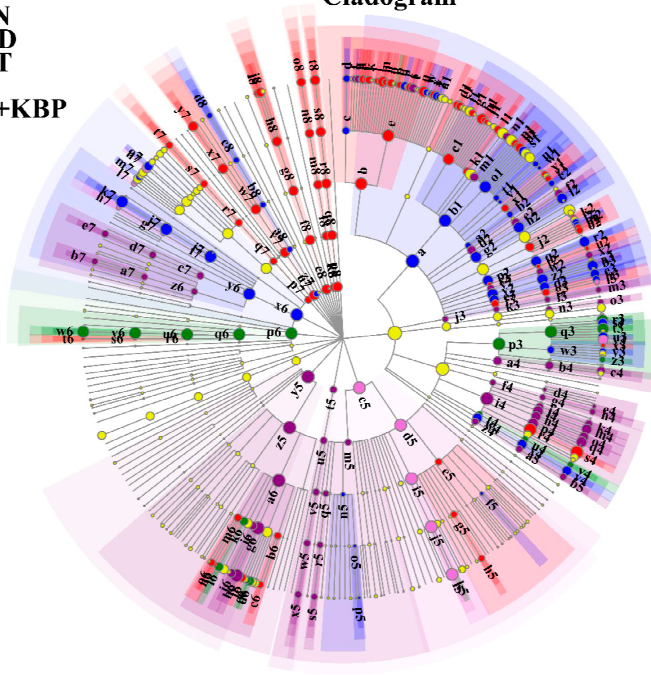

- a : c\_Clostridia
- b : o\_Lachnospirales
- c : f\_Defluviitaleaceae
- d : g\_Defluviitaleaceae\_UCG-011
- e : f\_Lachnospiraceae
- f : g\_Acetivomaculum
- g : g\_Butyrvibrio
- h : g\_Acetatifactor
- i : g\_Roseburia
- j : g\_Lachnospiraceae\_UCG-001
- k : g\_Lachnospiraceae\_UCG-006
- l : g\_Tuzzerella
- m : g\_Lachnospiraceae\_NK41136\_group
- n : g\_Lachnospiraceae\_ND3007\_group
- o : g\_Eubacterium\_ruminantium\_group
- p : g\_Eubacterium\_xylanophilum\_group
- q : g\_Anaerostipes
- r : g\_unclassified\_f\_Lachnospiraceae
- s : g\_Frisingiicoccus
- t : g\_Ruminococcus\_torques\_group
- u : g\_norank\_f\_Lachnospiraceae
- v : g\_Blaustia
- w : g\_Lachnospiraceae\_UCG-010
- x : o\_Oscillospirales
- y : g\_unclassified\_f\_Ruminococcaceae
- z : g\_Eubacterium\_viraeum\_group
- aa : g\_Candidatus\_Soleiferreus
- ab : g\_Fournierella
- ac : g\_Ruminococcus
- ad : g\_Harryflintia
- ae : g\_Anaerotruncus
- af : g\_unclassified\_o\_Oscillospirales
- ag : o\_Oscillospirales
- ah : g\_norank\_f\_norank\_o\_Oscillospirales
- ai : g\_Clostridium\_methylpentosum\_group
- aj : g\_Caldicoprobacter
- ak : f\_Butyricicoccaceae
- al : g\_unclassified\_o\_Lactobacillales
- am : f\_Enterococcaceae
- an : g\_Enterococcus
- ao : f\_Leuconostocaceae
- ap : g\_Weissella
- aq : f\_Aerococcaceae
- ar : g\_Aerococcus
- as : f\_Lactobacillaceae
- at : g\_Lactobacillus
- au : g\_Butyricicoccus
- av : o\_norank\_c\_Clostridia
- aw : g\_norank\_f\_norank\_o\_norank\_c\_Clostridia
- ax : o\_Clostridiales
- ay : f\_Clostridiaceae
- az : g\_Clostridium\_sensu\_stricto\_1
- ba : f\_Anaerovaracaceae
- bb : g\_Eubacterium\_nodatum\_group
- bc : g\_Family\_XIII\_AD3011\_group
- bd : g\_Eubacterium\_brachy\_group
- be : g\_Anaerovarax
- bf : o\_Clostridia\_UCG-014
- bg : f\_norank\_o\_Clostridia\_UCG-014
- bh : g\_norank\_f\_norank\_o\_Clostridia\_UCG-014
- bi : o\_Caldicoprobacteriales
- bj : f\_Caldicoprobacteraceae
- bk : o\_Micrococcales
- bl : f\_Micrococaceae
- bm : g\_Rothia
- bn : o\_Corynebacteriales
- bo : f\_Corynebacteriaceae
- bp : g\_Corynebacterium
- bq : o\_Actinomycetales
- br : f\_Actinomycetaceae
- bs : g\_Actinomycetes
- bt : g\_Turicibacter
- bu : g\_norank\_f\_Erysipelotrichaceae
- bv : g\_Faecalibaculum
- bw : g\_unclassified\_f\_Erysipelotrichaceae
- bx : g\_Erysipelotrichaceae\_UCG-003
- by : g\_Candidatus\_Stoquefichus
- bz : g\_unclassified\_f\_Christensenellaceae
- ca : g\_Christensenellaceae\_R-7\_group
- cb : o\_Monoglobales
- cc : f\_Monoglobaceae
- cd : g\_Monoglobus
- ce : o\_Peptococcales
- cf : f\_Peptococcaceae
- cg : g\_norank\_f\_Peptococcaceae
- ch : g\_Peptococcus
- ci : c\_unclassified\_p\_Firmicutes
- cj : f\_Veillonellaceae
- ck : g\_Veillonella
- cl : o\_Erysipelotrichales
- cm : f\_Erysipelotrichaceae
- cn : o\_Clostridia\_vadinBB60\_group
- co : o\_Christensenellales
- cp : f\_Planococcaceae
- cq : g\_Kurthia
- cr : o\_Acholeplasmatales
- cs : f\_Acholeplasmataceae
- ct : g\_Anaeroplasmata
- cu : o\_Lactobacillales
- cv : f\_unclassified\_o\_Lactobacillales
- cw : g\_norank\_f\_norank\_o\_Isemoplasmatales
- cx : p\_Proteobacteria
- cy : c\_Gammaproteobacteria
- cz : o\_Burkholderiales
- da : f\_Nitrosomonadaceae
- db : f\_Sutterellaceae
- dc : g\_Parasutterella
- dd : o\_Enterobacteriales
- de : g\_Klebsiella
- df : c\_Alphaproteobacteria
- dg : o\_Rhizobiales
- dh : f\_Rhizobiaceae
- di : g\_Alloporhizobium-Neorhizobium-Pararhizobium-Rhizobium
- dj : g\_norank\_f\_norank\_o\_Rhodospirillales
- dk : f\_Elusimicrobiota
- dl : o\_Elusimicrobiales
- dm : f\_Elusimicrobiaceae
- dn : g\_Elusimicrobium
- do : p\_Bacteroidota
- dp : c\_Bacteroidia
- dq : o\_Bacteroidales
- dr : f\_Marinifilaceae
- ds : g\_Butyricimonas
- dt : g\_Prevotellaceae\_Go6A1\_group
- du : g\_unclassified\_f\_Prevotellaceae
- dv : g\_Prevotella
- dw : f\_Muribaculaceae
- dx : g\_norank\_f\_Muribaculaceae
- dy : f\_Barnesiellaceae
- dz : g\_norank\_f\_Barnesiellaceae
- ea : f\_Tannerellaceae
- eb : g\_Parabacteroides
- ec : f\_Rikenellaceae
- ed : g\_Alistipes
- ee : p\_Verrucomicrobiota
- ef : c\_Verrucomicrobiales
- eg : o\_Opitutales
- eh : f\_Punicicoccaceae
- ei : g\_norank\_f\_Punicicoccaceae
- ej : o\_Verrucomicrobiales
- ek : f\_Akkermansia
- el : p\_Actinobacteriota
- em : g\_Gordonibacter
- en : g\_Dubosiella
- eo : g\_Allobaculum
- ep : g\_unclassified\_f\_Atopobiaceae
- eq : f\_Coriobacteriaceae\_UCG-002
- er : p\_Deferribacterota
- es : c\_Deferribacteres
- et : o\_Deferribacteriales
- eu : f\_Deferribacteraceae
- ev : f\_Macrispirillum
- ew : p\_Pateschacteria
- ex : g\_Saccharimonadina
- ey : o\_Saccharimonadales
- ez : f\_Saccharimonadaceae
- fa : g\_Candidatus\_Saccharimonas
- fb : g\_unclassified\_k\_norank\_d\_Bacteria
- fc : p\_Desulfobacterota
- fd : c\_Desulfovibrionia
- fe : o\_Desulfovibrionales
- ff : g\_norank\_f\_Desulfovibrionaceae
- fg : g\_Desulfovibrio
- fh : p\_Campylobacterota
- fi : o\_Campylobacteriales
- fj : f\_Helicobacteraceae
- fj : g\_Helicobacter
- fj : c\_Spirochaetia
- fj : o\_Spirochaetales
- fj : f\_Spirochaetaceae
- fj : g\_Treponema
