# Supplementary material for: Metallothionein–Kidney Bean Polyphenol Complexes Showed Antidiabetic Activity in Type 2 Diabetic Rats by Improving Insulin Resistance and Regulating Gut Microbiota
Source: MDPI journal article supplement (doi:10.3390/foods12163139), 2023-08-21
Supplement: s1 [file s1]

**Supplementary table S1.** Compositions and contents of polyphenolic compounds in the purified kidney bean polyphenol extracts.

| Compositions              | Contents (ng/mL)  |
|---------------------------|-------------------|
| Gallic acid               | 8.446 ± 0.032     |
| Phenylalanine             | 264.288 ± 0.932   |
| 3,4-Dihydroxybenzoic acid | 1547.064 ± 15.085 |
| Protocatechualdehyde      | 656.613 ± 4.648   |
| 4-Hydroxybenzoic acid     | 248.233 ± 6.433   |
| Catechin                  | 699.897 ± 7.216   |
| Vanillic acid             | 329.067 ± 2.268   |
| Caffeic acid              | 87.172 ± 1.356    |
| Syringic acid             | 78.881 ± 0.905    |
| L-Epicatechin             | 530.920 ± 10.383  |
| Vanillin                  | 79.399 ± 1.443    |
| p-Hydroxycinnamic Acid    | 520.272 ± 2.799   |
| Syringaldehyde            | 3.397 ± 0.067     |
| Salicylic acid            | 57.978 ± 0.630    |
| Ferulic acid              | 2094.553 ± 16.945 |
| Sinapic Acid              | 83.454 ± 0.209    |
| Benzoic acid              | 524.783 ± 4.789   |
| Hydrocinnamic acid        | 1.579 ± 0.041     |
| Trans-Cinnamic acid       | 476.874 ± 6.710   |
